# Supplementary material for: Perinatal outcomes of midwife-led care, stratified by medical risk: a retrospective cohort study from British Columbia (2008–2018)
Source: PubMed Central journal article supplement — CMAJ. 2023 Feb 27;195(8):E292–9. doi: 10.1503/cmaj.220453 (PMC9970624; doi:10.1503/cmaj.220453), 2023-02-27
Supplement: 220453-res-2-at.pdf [file 220453-res-2-at.pdf]

**Supplemental Table 2:** Adjusted absolute risk differences and 95% confidence intervals

|                                               | MW/FP                    | MW/OB                    |
|-----------------------------------------------|--------------------------|--------------------------|
| <b>Perinatal death</b>                        |                          |                          |
| Low risk (0-2)                                | 0.000 (-0.001 - 0.001)   | -0.003 (-0.004 - -0.002) |
| Moderate risk (3-6)                           | -0.002 (-0.004 - 0.000)  | -0.003 (-0.005 - -0.001) |
| High risk ( $\geq 7$ )                        | -0.004 (-0.017 - 0.010)  | -0.001 (-0.014 - 0.011)  |
| All                                           | -0.001 (-0.002 - -0.000) | -0.006 (-0.007 - -0.004) |
| <b>Low birth weight (&lt;2500g)</b>           |                          |                          |
| Low risk (0-2)                                | -0.005 (-0.007 - -0.004) | -0.018 (-0.020 - -0.016) |
| Moderate risk (3-6)                           | -0.027 (-0.032 - -0.021) | -0.051 (-0.056 - -0.045) |
| High risk ( $\geq 7$ )                        | -0.071 (-0.108 - -0.034) | -0.140 (-0.175 - -0.105) |
| All                                           | -0.018 (-0.020 - -0.016) | -0.076 (-0.079 - -0.072) |
| <b>Preterm birth (&lt;37 weeks)</b>           |                          |                          |
| Low risk (0-2)                                | -0.008 (-0.011 - -0.006) | -0.027 (-0.030 - -0.024) |
| Moderate risk (3-6)                           | -0.036 (-0.044 - -0.029) | -0.061 (-0.068 - -0.054) |
| High risk ( $\geq 7$ )                        | -0.075 (-0.114 - -0.036) | -0.157 (-0.193 - -0.120) |
| All                                           | -0.025 (-0.028 - -0.021) | -0.094 (-0.098 - -0.090) |
| <b>Apgar &lt;7 at 5 minutes</b>               |                          |                          |
| Low risk (0-2)                                | -0.006 (-0.008 - -0.004) | -0.008 (-0.010 - -0.005) |
| Moderate risk (3-6)                           | -0.010 (-0.014 - -0.006) | -0.009 (-0.013 - -0.004) |
| High risk ( $\geq 7$ )                        | -0.017 (-0.039 - 0.005)  | -0.016 (-0.037 - 0.005)  |
| All                                           | -0.008 (-0.010 - -0.006) | -0.014 (-0.016 - -0.012) |
| <b>Cesarean section</b>                       |                          |                          |
| Low risk (0-2)                                | -0.050 (-0.054 - -0.047) | -0.344 (-0.351 - -0.337) |
| Moderate risk (3-6)                           | -0.112 (-0.121 - -0.103) | -0.553 (-0.562 - -0.545) |
| High risk ( $\geq 7$ )                        | -0.116 (-0.155 - -0.077) | -0.422 (-0.459 - -0.385) |
| All                                           | -0.080 (-0.084 - -0.076) | -0.506 (-0.512 - -0.501) |
| <b>Labour induction with oxytocin</b>         |                          |                          |
| Low risk (0-2)                                | -0.039 (-0.043 - -0.036) | -0.068 (-0.072 - -0.064) |
| Moderate risk (3-6)                           | -0.047 (-0.055 - -0.039) | -0.001 (-0.008 - 0.007)  |
| High risk ( $\geq 7$ )                        | -0.006 (-0.040 - 0.028)  | 0.113 (0.082 - 0.145)    |
| All                                           | -0.045 (-0.048 - -0.042) | -0.050 (-0.053 - -0.046) |
| <b>Assisted vaginal delivery</b>              |                          |                          |
| Low risk (0-2)                                | -0.049 (-0.051 - -0.046) | -0.061 (-0.064 - -0.057) |
| Moderate risk (3-6)                           | -0.043 (-0.048 - -0.038) | -0.017 (-0.022 - -0.013) |
| High risk ( $\geq 7$ )                        | -0.022 (-0.039 - -0.005) | 0.001 (-0.014 - 0.017)   |
| All                                           | -0.046 (-0.049 - -0.044) | -0.038 (-0.041 - -0.036) |
| <b>Third or fourth degree perineal tears*</b> |                          |                          |
| Low risk (0-2)                                | -0.001 (-0.004 - 0.001)  | -0.018 (-0.021 - -0.015) |
| Moderate risk (3-6)                           | 0.004 (-0.001 - 0.010)   | -0.005 (-0.010 - 0.001)  |
| High risk ( $\geq 7$ )                        | 0.006 (-0.020 - 0.031)   | -0.003 (-0.028 - 0.022)  |
| All                                           | -0.000 (-0.002 - 0.002)  | -0.015 (-0.018 - -0.012) |
| <b>Spontaneous vaginal birth</b>              |                          |                          |
| Low risk (0-2)                                | 0.106 (0.102 - 0.111)    | 0.427 (0.420 - 0.433)    |
| Moderate risk (3-6)                           | 0.165 (0.155 - 0.175)    | 0.583 (0.574 - 0.591)    |
| High risk ( $\geq 7$ )                        | 0.141 (0.101 - 0.182)    | 0.411 (0.373 - 0.450)    |

|                                          |                        |                       |
|------------------------------------------|------------------------|-----------------------|
| All                                      | 0.135 (0.131 - 0.140)  | 0.556 (0.551 - 0.561) |
| <b>Vaginal birth after cesarean**</b>    | <b>MW/FP</b>           | <b>MW/OB</b>          |
| Low risk (0-2)                           | 0.077 (0.039 - 0.116)  | 0.353 (0.308 - 0.398) |
| Moderate risk (3-6)                      | 0.048 (0.024 - 0.073)  | 0.301 (0.272 - 0.330) |
| High risk ( $\geq 7$ )                   | 0.021 (-0.058 - 0.099) | 0.218 (0.139 - 0.297) |
| All                                      | 0.055 (0.035 - 0.075)  | 0.305 (0.281 - 0.330) |
| <b>Breastfeeding initiation at birth</b> |                        |                       |
| Low risk (0-2)                           | 0.074 (0.068 - 0.080)  | 0.188 (0.181 - 0.195) |
| Moderate risk (3-6)                      | 0.128 (0.117 - 0.138)  | 0.242 (0.231 - 0.252) |
| High risk ( $\geq 7$ )                   | 0.157 (0.118 - 0.196)  | 0.248 (0.211 - 0.285) |
| All                                      | 0.094 (0.088 - 0.099)  | 0.235 (0.229 - 0.240) |

Adjusted for: Parity, maternal residence, history of mental health condition, substance use during pregnancy, and antenatal hospital admissions  
 \*Analysis is restricted to those with a vaginal birth; bold numbers denote statistical significance \*\*Denominator includes people with a previous cesarean scar who were identified as eligible for VBAC or eligibility is unknown or not documented, and current delivery was singleton, vertex presentation. Denominator excludes women with a delivery episode and a history of cesarean who were not eligible for VBAC per the chart or women with a previous scar and unknown or not documented VBAC eligibility who did not have a singleton vertex pregnancy.  
 MW= midwife; FP=family physician; OB=obstetrician
