# Supplementary material for: Perinatal outcomes of midwife-led care, stratified by medical risk: a retrospective cohort study from British Columbia (2008–2018)
Source: PubMed Central journal article supplement — CMAJ. 2023 Feb 27;195(8):E292–9. doi: 10.1503/cmaj.220453 (PMC9970624; doi:10.1503/cmaj.220453), 2023-02-27
Supplement: 220453-res-3-at.pdf [file 220453-res-3-at.pdf]

**Supplemental Table 3:** Adverse maternal outcomes, stratified by MRP and antenatal risk categories

|                            | Midwife MRP       | Family Physician MPR | Obstetrician MPR  |
|----------------------------|-------------------|----------------------|-------------------|
| Low risk (0-2)             |                   |                      |                   |
| Blood transfusion          | 123/46,632 (0.3%) | 603/132,309 (0.5%)   | 481/76,694 (0.6%) |
| ICU admissions             | 7/46,632 (0%)     | 37/132,309 (0%)      | 39/76,694 (0.1%)  |
| Uterine Rupture*           | 5/43,276 (0%)     | 10/116,138 (0%)      | <5 cases/44,218   |
| Postpartum wound infection | 21/46,632 (0%)    | 148/132,309 (0.1%)   | 143/76,694 (0.2%) |
| Moderate risk (3-6)        |                   |                      |                   |
| Blood transfusion          | 94/15,437 (0.6%)  | 491/51,519 (1.0%)    | 797/77,142 (1.0%) |
| ICU admissions             | <5 cases/15,437   | 53/51,519 (0.1%)     | 93/77,142 (0.1%)  |
| Uterine Rupture*           | <5 cases/13,041   | 12/38,181 (0%)       | 6/24,235 (0%)     |
| Postpartum wound infection | 14/15,437 (0.1%)  | 176/51,519 (0.3%)    | 246/77,142 (0.3%) |
| High risk (≥ 7)            |                   |                      |                   |
| Blood transfusion          | 19/1082 (1.8%)    | 90/5851 (1.5%)       | 501/18,390 (2.7%) |
| ICU admissions             | <5 cases/1082     | 15/5851 (0.3%)       | 87/18,390 (0.5%)  |
| Uterine Rupture*           | <5 cases/671      | <5 cases/3003        | <5 cases/3607     |
| Postpartum wound infection | 61,082 (0.6%)     | 69/5851 (1.2%)       | 100/18,390 (0.5%) |

\*Analysis restricted to those with vaginal birth
